# Supplementary material
Source: publisher figshare collection journal article supplement (https://acs.figshare.com/ndownloader/files/4322890)

# Folding of a supramolecular framework based on a tetrametallic clips driven by $\pi$ - $\pi$ interactions.

Tomohiro Agou, Manuel Sébastien, Christophe Lescop\* and Régis Réau\*

Sciences Chimiques de Rennes, UMR 6226, CNRS-Université de Rennes 1, Campus de Beaulieu,  
35042 Rennes Cedex, France

## Supporting Information

### I. Experimental Section

All experiments were performed under an atmosphere of dry argon using standard Schlenk techniques. Commercially available reagents were used as received without further purification. Solvents were freshly distilled under argon from sodium/benzophenone (diethylether, THF) or from phosphorus pentoxide (dichloromethane).  $^1\text{H}$  and  $^{13}\text{C}$  NMR spectra were recorded on Bruker AV300, DPX200 or AV500 spectrometers.  $^1\text{H}$  and  $^{13}\text{C}$  NMR chemical shifts were reported in parts per million (ppm) relative to  $\text{Me}_4\text{Si}$  as external standard. Elemental analyses were performed by the "CRMPO", University of Rennes 1 or the "Centre de Microanalyse du CNRS" at Vernaison, France. *p*-Phenylenebis(dichlorophosphine)<sup>[S1]</sup> was synthesized according to procedure previously published. The  $\text{BF}_4^-$  salt of the molecular bis-clip **2** was prepared according to the same route than the  $\text{PF}_6^-$  salts using  $[\text{Cu}(\text{CH}_3\text{CN})_4]\text{BF}_4$  as Cu(I) source instead of  $[\text{Cu}(\text{CH}_3\text{CN})_4]\text{PF}_6$ .<sup>[S2]</sup>

**Synthesis of ligand 1:** 300 mg (1.22 mmol) of 1,8-di(2-pyridyl)octa-1,7-diyne and 356 mg (1.22 mmol) of  $\text{Cp}_2\text{ZrCl}_2$  were degassed for 30 mn at room temperature and then dissolved in 25 ml of THF. This solution was then cooled to  $-80^\circ\text{C}$  and 2.5 mmol (1 ml, 2.5 M in hexane) of *n*-Buli were slowly added. The resulting solution stayed for one hour at  $-80^\circ\text{C}$  and then allowed to warm to room temperature overnight. Then the brown solution was cooled to  $-80^\circ\text{C}$  and 143 mg (0.51 mmol) of *p*-phenylenebis(dichlorophosphine) dissolved in 5 ml of diethylether were added slowly. The solution was left at for one hour at  $-80^\circ\text{C}$  and allowed to warm to room temperature (ca 4 hours). The solution was then filtrated under inert atmosphere over basic  $\text{Al}_2\text{O}_3$  and extracted with 40 ml of THF. The solvent from the filtrate was evaporated and the residue was washed with 20 ml of pentane affording **1** as a bright yellow powder (171 mg, 51 % yield).

$^1\text{H}$  NMR (200 MHz,  $\text{CDCl}_3$ ):  $\delta$  = 1.57-1.90 (m, 8H,  $\text{C}=\text{C}-\text{CH}_2-\text{CH}_2$ ), 2.65-2.88 (m, 4H,  $\text{C}=\text{C}-\text{CH}_2$ ), 3.13-3.34 (m, 4H,  $\text{C}=\text{C}-\text{CH}_2$ ), 6.85-6.96 (m, 8H, pyridyl  $\text{H}_4$  and pyridyl  $\text{H}_5$ ), 7.36 (bd, 4H,  $^3J_{\text{PH}} = 8.3$  Hz H-Ph), 7.49 (bt, 4H,  $^3J_{\text{HH}} = 7.7$  Hz, pyridyl  $\text{H}_3$ ), 8.41 (bd, 4H,  $^3J_{\text{HH}} = 4.7$  Hz, pyridyl  $\text{H}_6$ );  $^{13}\text{C}\{^1\text{H}\}$  NMR (75.46 MHz,  $\text{CDCl}_3$ ):  $\delta$  = 23.7 (s,  $\text{C}=\text{C}-\text{CH}_2-\text{CH}_2$ ), 29.3 (s  $\text{C}=\text{C}-\text{CH}_2$ ), 121.2 (s, pyridyl  $\text{C}_5$ ), 124.4 (d,  $^3J_{\text{PC}} = 9.4$  Hz, pyridyl  $\text{C}_3$ ), 132.8 (d,  $^1J_{\text{PC}} = 9.4$  Hz, phenyl *ipso*-C), 133.7 (dd,  $^2J_{\text{PC}} = 18.0$  Hz,  $^3J_{\text{PC}} = 7.0$  Hz, phenyl -CH), 136.5 (s, pyridyl  $\text{C}_4$ ), 144.2 (d,  $^1J_{\text{PC}} = 4.7$  Hz, P-C=C), 148.5 (d,  $^2J_{\text{PC}} = 11.0$  Hz, P-C=C), 150.0 (s, pyridyl  $\text{C}_6$ ), 156.4 (d,  $^2J_{\text{PC}} = 19.6$  Hz, pyridyl  $\text{C}_2$ ).  $^{31}\text{P}\{^1\text{H}\}$  NMR (121.5 MHz,  $\text{CDCl}_3$ ):  $\delta$  = +12.3 ppm.

HR-MS (ESI)  $m/z$  calcd for  $\text{C}_{42}\text{H}_{36}\text{N}_4\text{P}_2\text{Na}$   $[\text{M}+\text{Na}]^+$  : 681.23074; found : 681.2305.

Elemental analysis calcd (%) for  $\text{C}_{42}\text{H}_{36}\text{N}_4\text{P}_2$  (658.71 g/mol): C 76.58, H 5.51, N 8.51; found C 76.45, H 5.67, N 8.59.

**Synthesis of complex 2:** 104 mg (0.157 mmol) of ligand **1** were dissolved in 20 ml of CH<sub>2</sub>Cl<sub>2</sub> and mixed at room temperature with 257 mg (0.691 mmol) of [Cu(CH<sub>3</sub>CN)<sub>4</sub>]PF<sub>6</sub> dissolved in 20 ml of CH<sub>2</sub>Cl<sub>2</sub>. The resulting yellow is left upon stirring for one hour then the solvent is evaporated. The resulting residue is washed with 2\*5 ml of THF (in order to remove the excess of [Cu(CH<sub>3</sub>CN)<sub>4</sub>]PF<sub>6</sub>) then left under vacuum for one night at 40 °C affording the complex **2** as a bright yellow powder (254 mg, 89 % yield). Single crystals of the complex **2** were obtained upon diethylether vapour diffusion onto a CH<sub>2</sub>Cl<sub>2</sub> solution of complex **2**.

<sup>1</sup>H NMR (200 MHz, CDCl<sub>3</sub>): δ = 2.1 (s, 24 H, CH<sub>3</sub>CN), 2.15-2.35 (m, 8H, C=C-CH<sub>2</sub>-CH<sub>2</sub>), 2.50-3.35 (m, 8H, C=C-CH<sub>2</sub>), 6.90 (bs, 4H, pyridyl H<sub>5</sub>), 7.18 (bs, 4H, H-Ph), 7.35 (m, 4H, pyridyl H<sub>4</sub>), 7.75 (m, 4H, pyridyl H<sub>3</sub>), 8.18 (bs, 4H, pyridyl H<sub>6</sub>);

<sup>13</sup>C{<sup>1</sup>H} NMR (75.46 MHz, CDCl<sub>3</sub>): δ = 1.1 (s, CH<sub>3</sub>CN), 23.7 (s, C=C-CH<sub>2</sub>-CH<sub>2</sub>), 29.3 (s C=C-CH<sub>2</sub>), 120.0 (s, CH<sub>3</sub>CN), 121.2 (s, pyridyl C<sub>5</sub>), 124.4 (d, <sup>3</sup>J<sub>PC</sub> = 9.4 Hz, pyridyl C<sub>3</sub>), 132.8 (d, <sup>1</sup>J<sub>PC</sub> = 9.4 Hz, phenyl *ipso*-C), 133.7 (dd, <sup>2</sup>J<sub>PC</sub> = 18.0 Hz, <sup>3</sup>J<sub>PC</sub> = 7.0 Hz, phenyl -CH), 136.5 (s, pyridyl C<sub>4</sub>) 144.2 (d, <sup>1</sup>J<sub>PC</sub> = 4.7 Hz, P-C=C), 148.5 (d, <sup>2</sup>J<sub>PC</sub> = 11.0 Hz, P-C=C), 150.0 (s, pyridyl C<sub>6</sub>), 156.4 (d, <sup>2</sup>J<sub>PC</sub> = 19.6 Hz, pyridyl C<sub>2</sub>).

<sup>31</sup>P{<sup>1</sup>H} NMR (121.5 MHz, CDCl<sub>3</sub>): δ = -2.2 ppm (μ-P), -142.7 ppm (sept, <sup>1</sup>J<sub>PF</sub> = 707.1 Hz, PF<sub>6</sub><sup>-</sup>).

Elemental analysis calcd (%) for C<sub>58</sub>H<sub>60</sub>Cu<sub>4</sub>F<sub>24</sub>N<sub>12</sub>P<sub>6</sub> (1821,17 g/mol): C 38.25, H 3.32, N 9.23; found C 38.41, H 3.11, N 9.59.

It is noteworthy that supramolecular derivatives **4** and **6** can also be obtained in similar isolated yields by simply mixing all their simple molecular components (ie. Cu<sup>+</sup>: dppm: **1** : linkers **3** or **5** in a 4 : 2 : 1 : 2 molar ratio) in CH<sub>2</sub>Cl<sub>2</sub> followed by pentane vapor diffusion.

**Synthesis of derivative 4:** 48 mg (0.03 mmol) of 'bis-clip' **2** (X = BF<sub>4</sub>), 23 mg (0.06 mmol) of dppm and 5 mg (0.06 mmol) of fumaronitrile (linker **3**) were dissolved in 20 ml of CH<sub>2</sub>Cl<sub>2</sub> at room temperature. The resulting yellow clear solution was left upon stirring at room temperature for four hours. A yellow precipitate was then observed and removed by filtration. The filtrate was then exposed to pentane vapour diffusions leading after one week to the formation of a homogeneous batch of yellow crystals of the CP **4**. These crystals were collected, left under vacuum at room temperature for one night affording the CP **4** as a bright yellow powder (34.2 mg, 53% yield).

<sup>31</sup>P{<sup>1</sup>H} NMR (81.02 MHz, CDCl<sub>3</sub>): δ = +15.0 ppm (t, <sup>2</sup>J<sub>PP</sub> = 83.7 Hz, 1P, μ-P), -0.1 ppm (d, <sup>2</sup>J<sub>PP</sub> = 83.7 Hz, 2P, P<sub>dppm</sub>).

Elemental analysis calcd (%) for C<sub>102</sub>H<sub>88</sub>Cu<sub>4</sub>F<sub>16</sub>N<sub>8</sub>P<sub>6</sub>B<sub>4</sub>Cl<sub>4</sub> (2354,90 g/mol): C 52.02, H 3.77, N 4.76; found C 52.19, H 3.41, N 4.41.

**Synthesis of derivative 6 (one pot procedure):** 20 mg (0.03 mmol) of ligand **1**, 38 mg (0.12 mmol) of [Cu(CH<sub>3</sub>CN)<sub>4</sub>]BF<sub>4</sub>, 23 mg (0.06 mmol) of dppm and 14 mg (0.06 mmol) of the linker **5** were dissolved in 20 ml of CH<sub>2</sub>Cl<sub>2</sub> at room temperature. The resulting yellow clear solution was left upon stirring at room temperature for eight hours. A yellow precipitate was then observed and removed by filtration. The filtrate was then exposed to pentane vapour diffusions leading after one week to the formation of a homogeneous batch of yellow crystals of the CP **6**. These crystals were collected, left under vacuum at room temperature for one night affording the CP **6** as a bright yellow powder (43.8 mg, 58 % yield).

<sup>31</sup>P{<sup>1</sup>H} NMR (81.02 MHz, CDCl<sub>3</sub>): δ = +12.9 ppm (bt, <sup>2</sup>J<sub>PP</sub> = 74.5 Hz, 1P, μ-P), -1.1 ppm (bd, <sup>2</sup>J<sub>PP</sub> = 74.5 Hz, 2P, P<sub>dppm</sub>).

Elemental analysis calcd (%) for C<sub>127</sub>H<sub>106</sub>Cu<sub>4</sub>F<sub>16</sub>N<sub>8</sub>P<sub>6</sub>B<sub>4</sub>Cl<sub>6</sub> (2744.22 g/mol): C 55.58, H 3.89, N 4.08; found C 55.87, H 4.03, N 3.87.

## II. X-ray Crystallographic Study :

**X-ray Crystallographic Study:** Single crystals suitable for X-Ray crystal analysis were obtained by slow diffusion of vapours of pentane into a dichloromethane solution of coordination complex **2** and of the coordination polymers **4** and **6** at room temperature. Single crystal data collection were performed at 100 K with an APEX II Bruker-AXS (Centre de Diffractométrie, Université de Rennes 1, France) with Mo-K $\alpha$  radiation ( $\lambda = 0.71073$  Å). Reflections were indexed, Lorentz-polarization corrected and integrated by the *DENZO* program of the KappaCCD software package. The data merging process was performed using the SCALEPACK program.<sup>[S3]</sup> Structure determinations were performed by direct methods with the solving program SIR97,<sup>[S4]</sup> that revealed all the non hydrogen atoms. SHELXL program<sup>[S5]</sup> was used to refine the structures by full-matrix least-squares based on  $F^2$ . All non-hydrogen atoms were refined with anisotropic displacement parameters. Hydrogen atoms were included in idealised positions and refined with isotropic displacement parameters. In the crystal lattices of the coordination polymers studied, dichloromethane (and one pentane molecule in the case of the coordination polymer **6**) solvent molecules were found in addition to the cationic coordination polymers and to their counter-anions. These solvent molecules have a strong tendency to leave the bulk crystal via evaporation once the crystals are removed from their mother solution, a process that induce a rapid degradation of the single-crystal integrity of the crystals investigated. In order to slow down this process, single crystals of all these derivatives were always coated in paratone oil once removed from the mother solution, mount at low temperature (100 K) as quickly as possible on the diffractometer goniometer and X-ray data collection were performed at low temperature (100 K). In most of the case, X-ray crystal structure resolution revealed these solvent molecules highly disordered. In the case of the coordination polymer **4**, modelling of the disorder of these solvent molecules was possible leading to rather high anisotropic displacement parameters for some of their atoms. Nevertheless, anisotropic displacement parameters associated to the atoms of the cationic coordination complexes are always satisfactory. Table S1 gives the crystallographic data for the derivatives **2** and **4**. In the case of the coordination polymer **6**, single crystals were very tiny and very sensitive to included solvent evaporation and collapsed very quickly once removed from the mother solvent, even though they were handled in paratone oil. After several attempts, we have been able to mount a single crystal of **6** having a very weak but satisfactory diffraction pattern. In addition, in this derivative, CH<sub>2</sub>Cl<sub>2</sub>, one pentane molecules, and counter-anions are highly disordered and delocalized and it was not possible to correctly localize them. We have proceeded to a 'squeeze' treatment in order to remove the scattering contribution of these molecules (CH<sub>2</sub>Cl<sub>2</sub> molecules and counter-anions) which can not be satisfactory modelled. Table S1 gives the crystallographic data for the coordination polymer **6** after this 'squeeze' treatment. Table S2 gives the crystallographic data for the derivatives **6** before such 'squeeze' treatment. The number of solvent molecule indicated correspond to the number of disordered dichloromethane molecules that could be identified. In addition, due to the poor quality of the X-ray data collection for the crystals of **6** due to the tiny size of the single crystal measured and the rapid desolvation of the included solvent molecules, some of the carbon atoms had to be refined with isotropic displacement parameters. For these reasons, final agreement (R) factors for **6** were determinate with modest values and several alerts level A appear in the checkcif file for derivative **6**. Atomic scattering factors for all atoms were taken from International Tables for X-ray Crystallography.<sup>[S6]</sup> CCDC reference numbers 789214, 789215 and 789216 contain the supplementary crystallographic data for derivatives **2**, **4** and **6** respectively. These data can be obtained free of charge at [www.ccdc.cam.ac.uk/conts/retrieving.html](http://www.ccdc.cam.ac.uk/conts/retrieving.html) or from the Cambridge Crystallographic Data Center, 12 union Road, Cambridge CB2 1EZ, UK; Fax: (internat.) + 44-1223-336-033; E-mail: [deposit@ccdc.cam.ac.uk](mailto:deposit@ccdc.cam.ac.uk)

S1 U. Honrath, L. Shu-Tang, H. Vahrenkamp, *Chem. Ber.* **1985**, *118*, 132-143.

S2 Y. Yao, W. Shen; B. Nohra, C. Lescop, R. Réau, *Chem. Eur. J.* **2010**, *16*, 7143–7163.

S3 Z. Otwinowski, W. In Minor, *Methods in Enzymology*, (Ed.: C.W. Carter, Jr. & R.M. Sweet), New York:Academic Press, **1997**, 276, 307.

S4 A. Altomare, M.C. Burla, M. Camalli, G. Cascarano, C. Giacovazzo, A. Guagliardi, A.G.G. Moliterni, G. Polidori, R. Spagna, *J. of Applied Cryst.* **1999**, *32*, 115.

S5 G.M. Sheldrick, *SHELX97*, Program for the Refinement of Crystal Structures, University of Göttingen, Germany, **1997**.

S6 International Tables for X-ray Crystallography, vol C, Ed. Kluwer, Dordrech, **1992**.

**Table S1** . Crystal data and structure refinement for the coordination complex **2**, for the derivative **4** and for the derivative **6** after the ‘squeeze’ treatment.

|                                                    | <b>2</b> · 4PF <sub>6</sub>                                                                    | <b>4</b> · 2BF <sub>4</sub> · 5CH <sub>2</sub> Cl <sub>2</sub>                                                               | <b>6</b>                                                                        |
|----------------------------------------------------|------------------------------------------------------------------------------------------------|------------------------------------------------------------------------------------------------------------------------------|---------------------------------------------------------------------------------|
| Molecular formula                                  | C <sub>58</sub> H <sub>60</sub> Cu <sub>4</sub> F <sub>24</sub> N <sub>12</sub> P <sub>6</sub> | C <sub>55</sub> H <sub>52</sub> Cu <sub>2</sub> F <sub>8</sub> N <sub>4</sub> P <sub>3</sub> B <sub>2</sub> Cl <sub>10</sub> | C <sub>124</sub> H <sub>100</sub> Cu <sub>4</sub> N <sub>8</sub> P <sub>6</sub> |
| CCDC number                                        | 789214                                                                                         | 789215                                                                                                                       | 789216                                                                          |
| Molecular weight                                   | 1821.16                                                                                        | 1517.12                                                                                                                      | 2142.10                                                                         |
| <i>a</i> [Å]                                       | 9.9984(4)                                                                                      | 12.849(2)                                                                                                                    | 15.367(4)                                                                       |
| <i>b</i> [Å]                                       | 24.3664(10)                                                                                    | 12.981(2)                                                                                                                    | 18.717(4)                                                                       |
| <i>c</i> [Å]                                       | 15.1535(6)                                                                                     | 20.113(3)                                                                                                                    | 27.879(7)                                                                       |
| $\alpha$ [°]                                       | 90                                                                                             | 73.033(5)                                                                                                                    | 97.301(2)                                                                       |
| $\beta$ [°]                                        | 95.606(2)                                                                                      | 90.042(5)                                                                                                                    | 98.417(2)                                                                       |
| $\gamma$ [°]                                       | 90                                                                                             | 86.256(5)                                                                                                                    | 105.936(2)                                                                      |
| <i>V</i> [Å <sup>3</sup> ]                         | 3674.1(3)                                                                                      | 3201.2(9)                                                                                                                    | 7509(3)                                                                         |
| <i>Z</i>                                           | 2                                                                                              | 2                                                                                                                            | 2                                                                               |
| $\rho_{\text{calcd}}$ [Mg m <sup>-3</sup> ]        | 1.646                                                                                          | 1.574                                                                                                                        | 0.947                                                                           |
| crystal system                                     | Monoclinic                                                                                     | Triclinic                                                                                                                    | Triclinic                                                                       |
| space group                                        | P2 <sub>1</sub> /c                                                                             | P-1                                                                                                                          | P-1                                                                             |
| <i>T</i> [K]                                       | 100(2)                                                                                         | 100(2)                                                                                                                       | 100(2)                                                                          |
| Wavelength Mo- <i>K</i> $\alpha$ (Å)               | 0.71069                                                                                        | 0.71069                                                                                                                      | 0.71069                                                                         |
| Crystal size [mm]                                  | 0.1 * 0.08 * 0.06                                                                              | 0.1 * 0.08 * 0.07                                                                                                            | 0.1 * 0.08 * 0.02                                                               |
| $\mu$ (Mo- <i>K</i> $\alpha$ ) [cm <sup>-1</sup> ] | 1.380                                                                                          | 1.221                                                                                                                        | 0.661                                                                           |
| <i>F</i> (000)                                     | 1828                                                                                           | 1530                                                                                                                         | 2212                                                                            |
| $\theta$ limit (°)                                 | 2.48 – 27.50                                                                                   | 1.06 – 26.48                                                                                                                 | 1.53 – 26.40                                                                    |
| Index ranges <i>hkl</i>                            | -12 ≤ <i>h</i> ≤ 12,<br>-16 ≤ <i>k</i> ≤ 31,<br>-19 ≤ <i>l</i> ≤ 19                            | -16 ≤ <i>h</i> ≤ 16,<br>-16 ≤ <i>k</i> ≤ 16,<br>-25 ≤ <i>l</i> ≤ 25                                                          | -19 ≤ <i>h</i> ≤ 19,<br>-23 ≤ <i>k</i> ≤ 23,<br>-34 ≤ <i>l</i> ≤ 34             |
| Reflections collected                              | 36469                                                                                          | 48036                                                                                                                        | 73746                                                                           |
| Independant reflections                            | 8380                                                                                           | 13137                                                                                                                        | 30290                                                                           |
| Reflections [ <i>I</i> > 2 $\sigma$ ( <i>I</i> )]  | 5598                                                                                           | 11247                                                                                                                        | 7146                                                                            |
| Data/restraints/parameters                         | 8380 / 0 / 473                                                                                 | 13137 / 0 / 776                                                                                                              | 30290 / 0 / 944                                                                 |
| Goodness-of-fit on <i>F</i> <sup>2</sup>           | 1.024                                                                                          | 1.125                                                                                                                        | 0.828                                                                           |
| Final <i>R</i> indices                             | <i>R</i> 1 = 0.0562                                                                            | <i>R</i> 1 = 0.0534                                                                                                          | <i>R</i> 1 = 0.1327                                                             |
| [ <i>I</i> > 2 $\sigma$ ( <i>I</i> )]              | <i>wR</i> 2 = 0.1372                                                                           | <i>wR</i> 2 = 0.1537                                                                                                         | <i>wR</i> 2 = 0.3239                                                            |
| <i>R</i> indices (all data)                        | <i>R</i> 1 = 0.0962                                                                            | <i>R</i> 1 = 0.0650                                                                                                          | <i>R</i> 1 = 0.2622                                                             |
|                                                    | <i>wR</i> 2 = 0.1570                                                                           | <i>wR</i> 2 = 0.1702                                                                                                         | <i>wR</i> 2 = 0.3571                                                            |
| Largest diff peak and hole (e Å <sup>-3</sup> )    | 1.567 and -0.551                                                                               | 1.368 and -1.024                                                                                                             | 1.229 and -1.020                                                                |

**Table S2 .** Crystal data and structure refinement for the derivative **6** before the ‘squeeze’ treatment

|                                                    | <b>6</b> 4BF <sub>4</sub> · 9CH <sub>2</sub> Cl <sub>2</sub> · C <sub>5</sub> H <sub>12</sub>                                   |
|----------------------------------------------------|---------------------------------------------------------------------------------------------------------------------------------|
| Molecular formula                                  | C <sub>138</sub> H <sub>122</sub> Cu <sub>4</sub> N <sub>8</sub> P <sub>6</sub> Cl <sub>18</sub> B <sub>4</sub> F <sub>16</sub> |
| Molecular weight                                   | 3317.76                                                                                                                         |
| <i>a</i> [Å]                                       | 15.367(4)                                                                                                                       |
| <i>b</i> [Å]                                       | 18.717(4)                                                                                                                       |
| <i>c</i> [Å]                                       | 27.879(7)                                                                                                                       |
| $\alpha$ [°]                                       | 97.301(2)                                                                                                                       |
| $\beta$ [°]                                        | 98.417(2)                                                                                                                       |
| $\gamma$ [°]                                       | 105.936(2)                                                                                                                      |
| <i>V</i> [Å <sup>3</sup> ]                         | 7509(3)                                                                                                                         |
| <i>Z</i>                                           | 2                                                                                                                               |
| $\rho_{\text{calcd}}$ [Mg m <sup>-3</sup> ]        | 1.467                                                                                                                           |
| crystal system                                     | Triclinic                                                                                                                       |
| space group                                        | P-1                                                                                                                             |
| <i>T</i> [K]                                       | 100(2)                                                                                                                          |
| Wavelength Mo- <i>K</i> $\alpha$ (Å)               | 0.71069                                                                                                                         |
| Crystal size [mm]                                  | 0.1 * 0.08 * 0.02                                                                                                               |
| $\mu$ (Mo- <i>K</i> $\alpha$ ) [cm <sup>-1</sup> ] | 1.014                                                                                                                           |
| <i>F</i> (000)                                     | 3364                                                                                                                            |
| $\theta$ limit (°)                                 | 1.53 – 26.40                                                                                                                    |
| Index ranges <i>hkl</i>                            | -19 ≤ <i>h</i> ≤ 19,<br>-23 ≤ <i>k</i> ≤ 23,<br>-34 ≤ <i>l</i> ≤ 34                                                             |
| Reflections                                        | 74083                                                                                                                           |
| collected                                          |                                                                                                                                 |
| Independant reflections                            | 30362                                                                                                                           |
| Reflections [ <i>I</i> > 2 $\sigma$ ( <i>I</i> )]  | 9275                                                                                                                            |
| Data/restraints/parameters                         | 30362 / 0 / 1712                                                                                                                |
| Goodness-of-fit on <i>F</i> <sup>2</sup>           | 1.282                                                                                                                           |
| Final <i>R</i> indices                             | <i>R</i> 1 = 0.2037                                                                                                             |
| [ <i>I</i> > 2 $\sigma$ ( <i>I</i> )]              | <i>wR</i> 2 = 0.4621                                                                                                            |
| <i>R</i> indices (all data)                        | <i>R</i> 1 = 0.3763                                                                                                             |
|                                                    | <i>wR</i> 2 = 0.5389                                                                                                            |
| Largest diff peak and hole (e Å <sup>-3</sup> )    | 1.672 and -1.313                                                                                                                |

**Table S3.** Selected bond lengths [Å] and angles [°] of the Cu<sub>2</sub>( $\mu$ -NPN) moieties of complexes **A**, **B** and **2**, and CPs **4** and **6**.

|          | Cu- $\mu$ P | Cu-N     | Cu <sup>··</sup> Cu | N-Cu- $\mu$ P |
|----------|-------------|----------|---------------------|---------------|
| <b>A</b> | 2.324(1)    | 2.040(4) | 2.568(1)            | 85.29(1)      |
|          | 2.314(1)    | 2.041(5) | -                   | 85.55(1)      |
| <b>B</b> | 2.413(8)    | 2.077(2) | 2.6822(9)           | 81.39(6)      |
|          | 2.402(8)    | 2.062(2) | -                   | 82.79(6)      |
| <b>2</b> | 2.2997(12)  | 2.044(4) | 2.5730(8)           | 85.65(10)     |
|          | 2.3265(12)  | 2.064(4) |                     | 86.42(11)     |
| <b>4</b> | 2.3576(12)  | 2.040(3) | 2.6415(11)          | 84.83(9)      |
|          | 2.3850(11)  | 2.040(3) |                     | 84.91(10)     |
| <b>6</b> | 2.391(4)    | 2.027(7) | 2.670(3)            | 81.9(2)       |
|          | 2.411(4)    | 2.030(6) |                     | 81.9(3)       |
|          | 2.355(4)    | 2.062(8) | 2.676(3)            | 82.3(3)       |
|          | 2.425(4)    | 2.076(8) |                     | 83.4(3)       |

**Scheme S1.** Labelling scheme adopted for the atoms of the derivatives **2**, **4** and **6**.

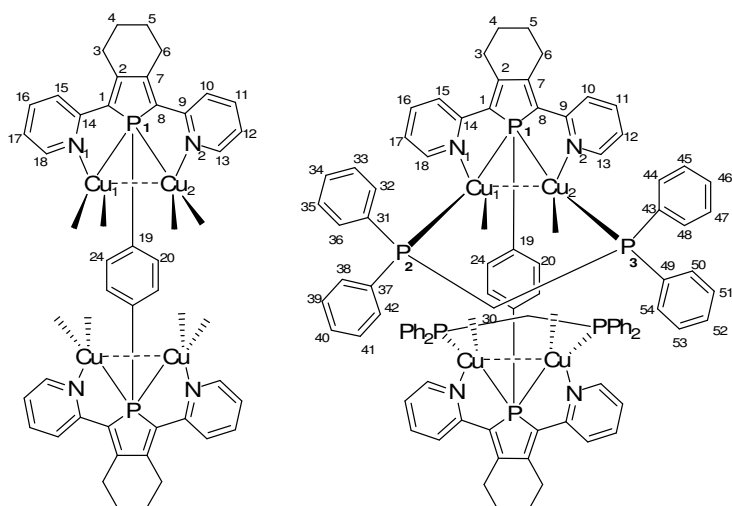

**Derivative 2**

**Derivative 4**

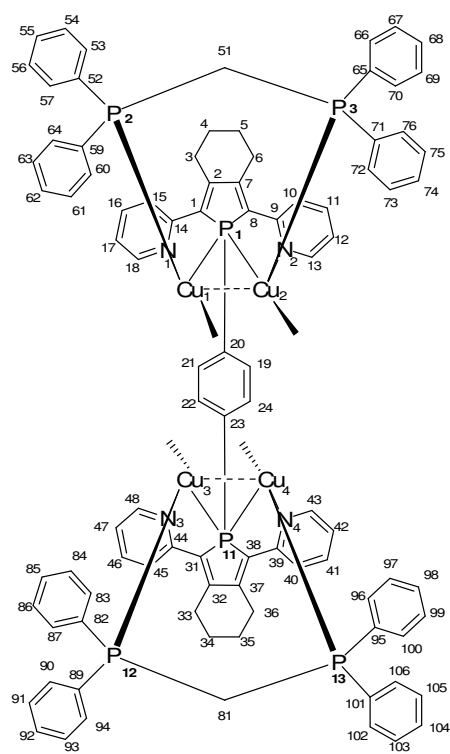

**Derivative 6**

**Figure S1.** Molecular structure of the cationic part of the derivative **2** (thermal ellipsoids 50% probability). Hydrogen atoms and  $\text{PF}_6^-$  counter anion have been omitted for clarity.

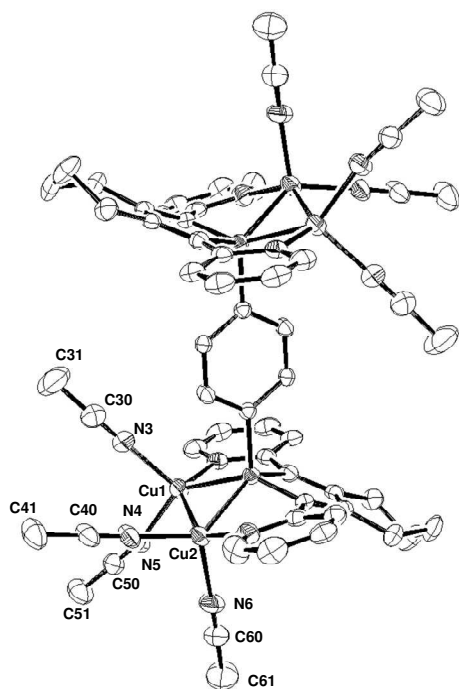

**Figure S2.** Molecular structure of the cationic part of the derivative **4** (thermal ellipsoids 50% probability). Hydrogen atoms and  $\text{BF}_4^-$  counter anion and dichloromethane solvent molecules have been omitted for clarity.

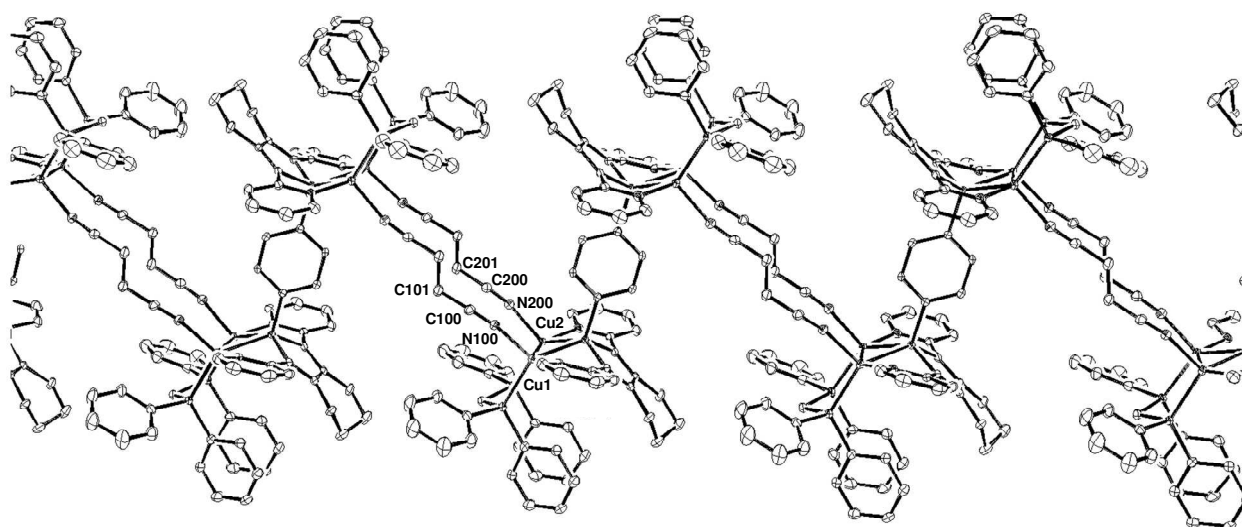



**Figure S3.** Molecular structure of the cationic part of the derivative **6** (thermal ellipsoids 50% probability).

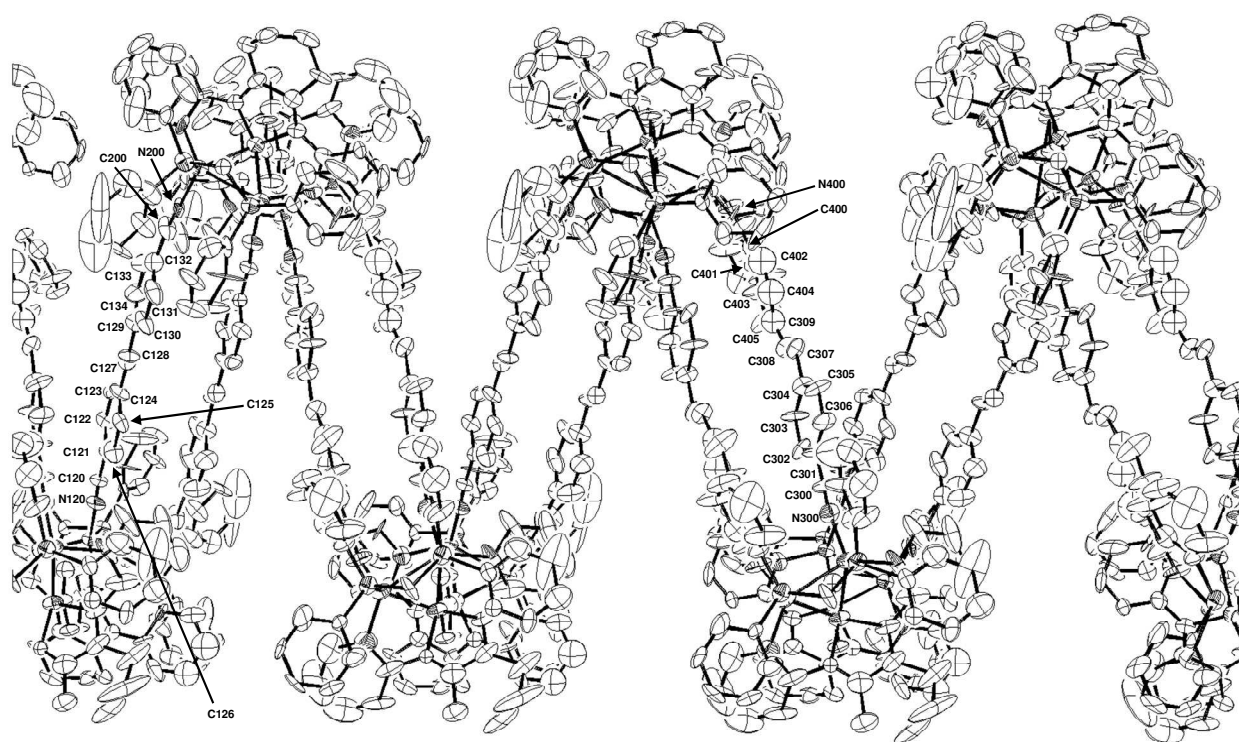

Supplement: Supplementary file 1 [file 4322890]
